# Supplementary material
Source: MDPI journal article supplement (https://www.mdpi.com/2076-3417/10/19/6672)

## Supplementary

**Figure S1.** Examples of the evaluation of size of poros determined using the ImageJ software.

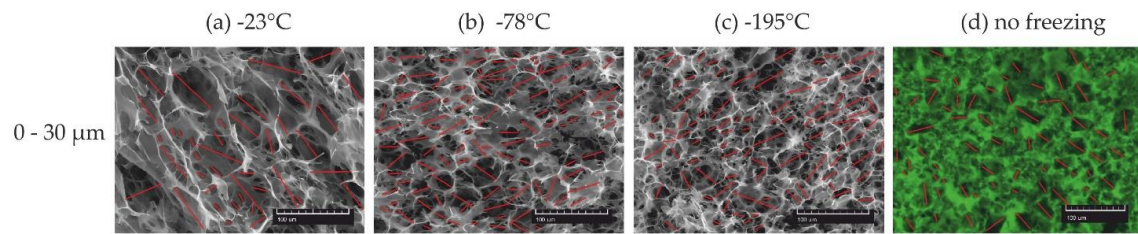

Supplement: s1 [file s1]
